# Supplementary material
Source: PubMed Central journal article supplement (PMC7272291)
Supplement: NIHMS1583660-supplement-1.pdf [file NIHMS1583660-supplement-1.pdf]

## **Supplemental Methods:**

### ***Quantitative real time-polymerase chain reaction (qRT-PCR).***

Pre-designed TaqMan gene specific primers (Life Technologies, Carlsbad, CA, USA): FGFR1 (forward: 5'-ACACCTTACACATGAACTCCAC-3', reverse: 5'-AGCATCAACCACACATACCAG-3'), FGFR2 (forward: 5'-GCTTGTCTTTGTCAATTCCCA-3', reverse: 5'-GTCTCCGAGTATGAACTTCCAG), FGFR3 (forward: 5'-CCAGCAGCTTCTTGTCCATC-3', reverse: 5'-GTACTIONGTGCCACTTCAGTGT-3').

### ***Immunofluorescence Assay for LC3B.***

Cells were plated in 8-well chamber slides at densities ranging from 5,000 to 9,000 cells/well. 24hrs after plating, they were treated with the indicated dose of AZD4547 or DMSO, irradiated with 3 Gy (Xstrahl RS225) after 1hr, and fixed with 70% methanol in PBS at indicated time points. Cells were permeabilized with 0.1% Triton-X 100 in TBST for 15 minutes, blocked with SuperBlock™ (Thermo Fisher #37515) for 1 hour in 25°C, and incubated with LC3B (D11) XP Rabbit mAb (Cell Signaling Technology #3868) antibody overnight at 4°C. Cells were then probed with Alexa Fluor 488 conjugated secondary antibody (CST #4413) for 1hr at 25°C in the dark, and cover-slipped with Fluoromount G containing DAPI. The next day, they were imaged at 60x magnification using a Nikon A1RS inverted point scanning confocal microscope system.

**Supplementary Table 1.** Short Tandem Repeat analysis of cell lines used in this study.

| <b>Cell Line</b> | <b>Source</b>                          | <b>Passage sent</b> | <b>Date sent</b> | <b># of allelic match</b> | <b>% allelic match</b> |
|------------------|----------------------------------------|---------------------|------------------|---------------------------|------------------------|
| NCI-H226         | ATCC                                   | P1                  | 9/28/2017        | 29/29                     | 100%                   |
| NCI-H520         | ATCC                                   | P1                  | 9/28/2017        | 24/24                     | 100%                   |
| NCI-H2228        | ATCC                                   | P1                  | 9/28/2017        | 22/22                     | 100%                   |
| NCI-H3122        | ATCC                                   | P1                  | 9/28/2017        | 15/15                     | 100%                   |
| NCI-H358         | ATCC                                   | P1                  | 9/28/2017        | 26/26                     | 100%                   |
| A549             | ATCC                                   | P1                  | 9/28/2017        | 23/24                     | 96%                    |
| NCI-H1581        | ATCC                                   | P1                  | 9/28/2017        | 29/29                     | 100%                   |
| BeasB2           | ATCC                                   | P1                  | 8/20/2019        | 30/30                     | 100%                   |
| HTE              | Klingelhutz Lab,<br>University of Iowa | P26                 | 8/30/2017        | See attached              |                        |

**Supplementary Table 2.** Antibodies used in this study.

| <b>Antibody</b>                                 | <b>Source</b> | <b>Company</b>            | <b>Catalog no.</b> | <b>Dilutions</b>                  |
|-------------------------------------------------|---------------|---------------------------|--------------------|-----------------------------------|
| AKT                                             | Mouse         | Cell Signaling Technology | 2920               | 1:2000                            |
| $\alpha$ -Tublin                                | Mouse         | Calbiochem                | CP06               | 1:5000                            |
| Cleaved Caspase-3<br>(Asp175)                   | Rabbit        | Cell Signaling Technology | 9661               | 1:200                             |
| FGFR1                                           | Rabbit        | Cell Signaling Technology | 9740               | 1:1000                            |
| FGFR2                                           | Rabbit        | Cell Signaling Technology | 11835              | 1:1000                            |
| FGFR3                                           | Rabbit        | Cell Signaling Technology | 4574               | 1:1000                            |
| GAPDH                                           | Mouse         | Cell Signaling Technology | 97166              | 1:10000                           |
| phospho-AKT (Ser473)                            | Rabbit        | Cell Signaling Technology | 4060               | 1:1000                            |
| phospho-Histone H2AX<br>(Ser139) (20E3)         | Rabbit        | Cell Signaling Technology | 9718               | In vitro 1:1000<br>In vivo: 1:200 |
| phospho-p44/42 MAPK<br>(Erk1/2) (Thr202/Tyr204) | Rabbit        | Cell Signaling Technology | 4370               | In vitro 1:1000<br>In vivo 1:200  |
| phospho-p44/42 MAPK<br>(Erk1/2)                 | Mouse         | Cell Signaling Technology | 4696               | 1:5000                            |
| phospho-S6 Ribosomal<br>Protein (Ser235/236)    | Rabbit        | Cell Signaling Technology | 4858               | 1:400                             |

**Supplemental Table 3:** Dose Enhancement factors at survival fraction of 0.1 ( $DEF_{0.1}$ ) and P-values for radiation clonogenic curves.

| <b>Cell line</b> | <b><math>DEF_{0.1}</math></b> | <b>P-value all points/curve (F-test)</b> |
|------------------|-------------------------------|------------------------------------------|
| NCI-1581         | 1.31                          | <0.0001                                  |
| NCI-H226         | 1.29                          | <0.0001                                  |
| NCI-H358         | 1.06                          | 0.01                                     |
| NCI-H520         | 1.11                          | 0.36                                     |
| NCI-H3122        | 1.08                          | 0.077                                    |
| A549             | 1.0                           | 0.83                                     |
| NCI-H2228        | 1.0                           | 0.10                                     |
| BeasB2           | 1.09                          | 0.001                                    |
| HTE              | 0.97                          | 0.38                                     |

**Supplemental Figure1**

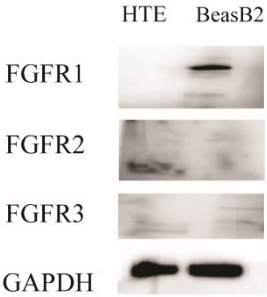

Western blot showing FGFR1, FGFR2 and FGFR3 protein levels in HTE and BeasB2 cell lines.

## Supplemental Figure 2

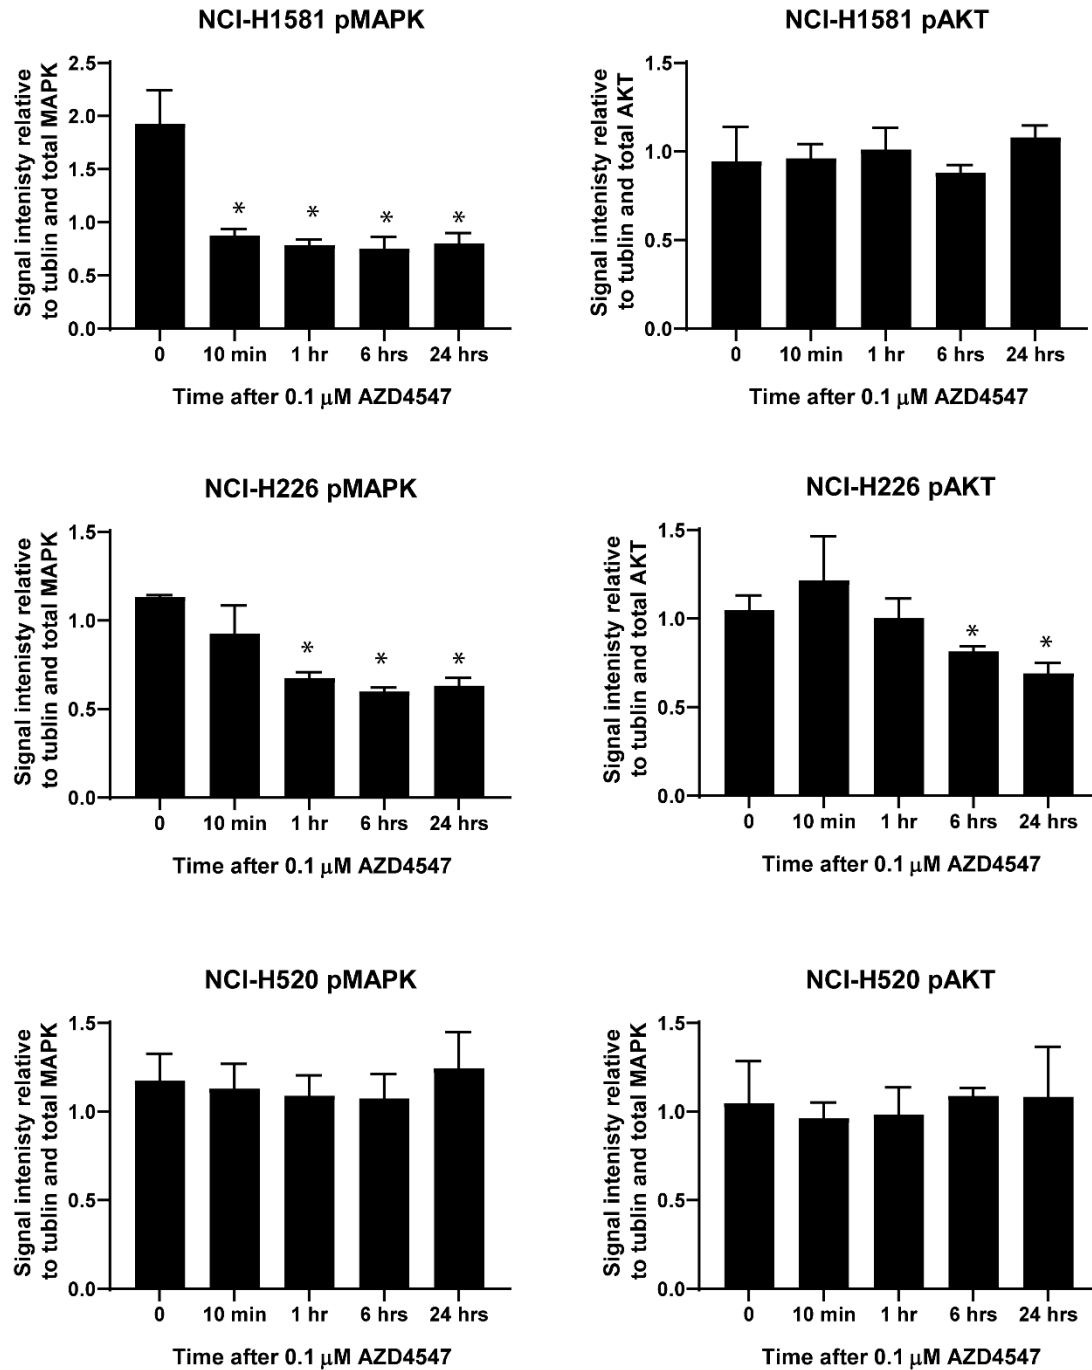

Normalized intensity quantification of pMAPK and pAKT proteins determined by western blot after treatment with AZD4547 in three NSCLC cell lines. NCI-H1581, NCI-H226 and NCI-H520 cells were treated for 10 minutes, 1 hour, 6 hours and 24 hours with 0.1 μM AZD4547. Intensity levels were first normalized to α-tubulin and then either total MAPK or AKT, respectively. Columns, mean; bars, SEM (n=3), \*, p-value <0.05 compared to no treatment.

### Supplemental Figure 3

A

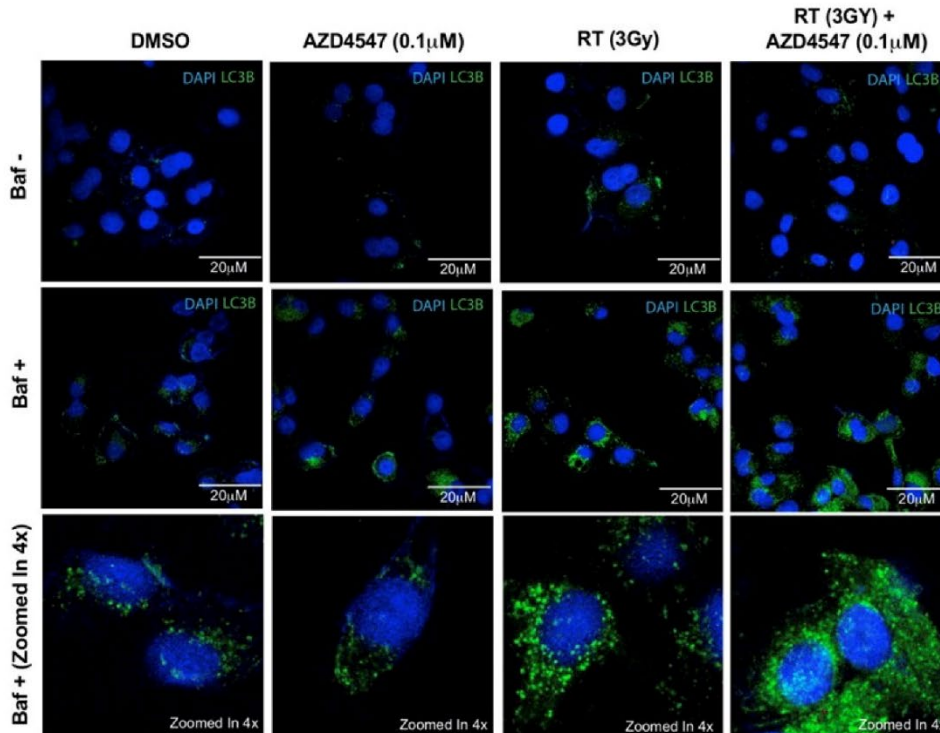

B

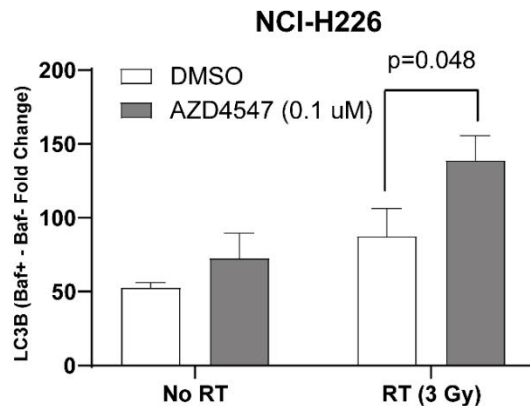

Combined radiation and AZD4547 induces autophagy. NCI-H226 cells were treated with DMSO, AZD4547 (0.1 μM), radiation (3 Gy), or combined AZD4547 (0.1 μM) and radiation (3 Gy) and analyzed at 72 hours post-treatment. (A) Representative immunofluorescence images tagged with LC3B antibody representing basal autophagy (Baf-) and autophagic flux (Baf+ minus Baf-) following treatments as indicated. (B) Quantification of Baf- and Baf+ fold change. Change in radiation plus AZD4547 compared to radiation alone was statistically significant with p-value of 0.048.

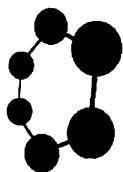

# Genetica

## CELL LINE TESTING

a LabCorp brand

1440 York Court, Burlington, NC 27215 USA www.celllineauthentication.com (513) 985-9777

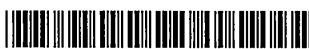

### Account Information

Account Number: 48203375  
UNIVERSITY OF WI-MADISON  
Acct Ref 1:  
Acct Ref 2:  
Acct Ref 3:  
MADISON, WI 53705

### Cell Line Evaluation

LabCorp Case # CX4-003942

| <u>Sample</u>      | <u>Label/Reference</u> | <u>LabCorp Id</u> | <u>Received</u> |
|--------------------|------------------------|-------------------|-----------------|
| Cell Line Sample 1 | HTE (p.26)             | 78U-9085-0        | 08/30/2017      |

### DNA Analysis

|      | D3S1358 | D7S820 | vWA    | FGA    | D8S1179 | D21S11 | D18S51 | D5S818 | D13S317 | D16S539 |
|------|---------|--------|--------|--------|---------|--------|--------|--------|---------|---------|
| SMP1 | 15, 17  | 8, 9   | 17, 18 | 20, 22 | 10, 13  | 30, 31 | 12, 16 | 10, 13 | 8, 11   | 9, 11   |

### DNA Analysis

|      | TH01 | TPOX | CSF1PO | AMEL | Penta D | Penta E | Mouse |
|------|------|------|--------|------|---------|---------|-------|
| SMP1 | 6, 8 | 11   | 11     | X    | 9, 14   | 12, 16  | NA*   |

### Conclusion:

Sample number 78U-9085-0, labeled HTE (p.26) was submitted for identification. Fifteen autosomal short tandem repeat (STR) loci and the gender identity locus amelogenin were profiled using PowerPlex 16 HS (Promega Corporation). The electropherograms of analyzed data are attached.

NA\* = No mouse DNA was detected for this sample.

Note: The information contained in this report does not constitute authentication of the submitted sample; further comparison to an appropriate reference sample (i.e. donor tissue/blood or low passage stock of in-house cell line) or database of cell line reference profiles is needed to designate the submitted sample as being related to a specific donor or reference cell line. A small amount of variation in the STR profiles of cell lines derived from the same donor is possible. It is recommended that an 80% match criteria be applied as detailed in the consensus standard ANSI/ATCC ASN-0002-2011. Authentication of human cell lines: Standardization of STR profiling.

Melanie S Trapani, PhD, F-ABC  
Director  
DNA Identification Testing Division  
Laboratory Corporation of America  
August 31, 2017
